## 31 **Abstract**

32 Objective: Inclusion body myositis (IBM) has an unclear molecular etiology due to the co-existence  
33 of characteristic cytotoxic T-cell activity and degeneration of muscle fibers. Using in-depth gene  
34 expression and splicing studies, we aimed at understanding the different components of the molecular  
35 pathomechanisms in IBM.

36 Methods: We performed RNA-seq on RNA extracted from skeletal muscle biopsies of clinically and  
37 histopathologically defined IBM (n=24), tibial muscular dystrophy (n=6), and histopathologically  
38 normal group (n=9). In a comprehensive transcriptomics analysis, we analyzed the differential gene  
39 expression, differential splicing and exon usage, downstream pathway analysis, and the interplay  
40 between coding and non-coding RNAs (micro RNAs and long non-coding RNAs).

41 Results: We observe dysregulation of genes involved in calcium homeostasis, particularly affecting  
42 the T-cell activity and regulation, causing disturbed  $Ca^{2+}$  induced apoptotic pathway of T cells in  
43 IBM muscles. Additionally, LCK/p56, which is an essential gene in regulating the fate of T-cell  
44 apoptosis, shows altered expression and splicing usage in IBM muscles

45 Interpretation: Our analysis provides a novel understanding of the molecular mechanisms in IBM by  
46 showing a detailed dysregulation of genes involved in calcium homeostasis and its effect on T-cell  
47 functioning in IBM muscles. Loss of T-cell regulation is hypothesized to be involved in the consistent  
48 observation of no response to immune therapies in IBM patients. Our results show that loss of  
49 apoptotic control of cytotoxic T cells could indeed be one component of their abnormal cytolytic  
50 activity in IBM muscles.

## 51 **Introduction**

52 Inclusion body myositis (IBM) is a late-onset, acquired muscle disease with unclear etiology, and the  
53 poorly understood molecular pathogenesis is under debate due to several factors. The CD8<sup>+</sup> T-cell  
54 infiltration and overexpression of class I MHC antigens in all muscle fibers indicate an autoimmune  
55 cascade and are, in fact, the most consistent finding together with the degeneration of myofibers.  
56 However, IBM largely remains refractory to immunosuppressive drugs [1], and comprehensive  
57 clinical trials have generally been ineffective [2]. A partial clinical and histopathological overlap with  
58 other rimmed-vacuolar (RV) myopathies [3] including accumulations of similar proteins in the RVs  
59 [4] support a degenerative pathophysiology. Accumulation/aggregation of these misfolded proteins  
60 suggests that IBM could be a protein aggregate disease with immune-mediated cytotoxic  
61 inflammation as a resulting secondary feature [5]. However, there is a significant variance in nature  
62 and the number of accumulated proteins observed in the IBM muscle biopsies [6]. Similar aggregates  
63 observed in HIV-associated IBM [7] suggest that protein aggregation can still be a downstream effect  
64 of immune dysfunction. Additionally, the occurrence of rare familial cases [8] and a strong  
65 association with immune MHC locus 8.1 ancestral haplotype [9, 10] support a possible genetic  
66 predisposition for IBM.

67 Analysis of tissue-specific mRNAs and subsequent RNA-seq based transcriptomics studies focused  
68 on understanding the expression of genes, participating pathways, and networks can increase our  
69 understanding of underlying pathomechanisms. Prior studies have investigated the differential gene  
70 expression in IBM muscles for both the inflammatory and the degenerative pathology [11-17].  
71 However, no study has attempted a comprehensive analysis of RNA-seq data combining differential  
72 gene expression, differential exon, and splicing usage along with an in-depth analysis of the relation  
73 between dysregulation of coding and regulatory RNAs in IBM muscles.

74 Our study used RNA extracted from muscle biopsies of IBM patients, of non-myositis RV-myopathy  
75 disease group, and a histopathologically group. We first studied the differential expression of coding,  
76 long non-coding RNAs (lncRNAs), and micro RNAs (miRNAs) and then evaluated their possible  
77 interplay. Additionally, we studied the transcriptome-wide differential exon and splicing usage. We  
78 observed a significant association with genes involved in various calcium-related pathways and  
79 identified disturbed calcium regulation specific to T cells in IBM muscles, highlighting the relevance  
80 of calcium homeostasis for T-cell activity in IBM muscles. In particular, we identified calcium-  
81 induced T lymphocyte apoptosis to be disturbed in IBM muscles.

82

## 83 **Materials and methods**

### 84 Patients and skeletal muscle biopsies

85 Muscle biopsies (predominantly Tibialis anterior or Vastus lateralis) from 24 Finnish patients  
86 diagnosed with clinically and pathologically defined IBM according to the ENMC criteria [18] were  
87 included. The age of onset was  $60 \pm 11$  years (median  $\pm$  SD), and the age at muscle biopsy was  $70 \pm$   
88 9 years. Additionally, muscle biopsies from six patients with genetically diagnosed Tibial muscular  
89 dystrophy (TMD, caused by heterozygous FINmaj mutation the titin gene) [19] were included. In the  
90 TMD cohort, the age of onset was  $49 \pm 11$  years, and age at biopsy  $54 \pm 14$  years. Nine muscle  
91 biopsies from individuals that underwent leg amputation for reasons other than a muscle disease [20]  
92 were also included. These nine biopsies did not show pathologically defined muscle degeneration or  
93 inflammation. Age at sampling for amputees was  $70 \pm 11$  years. All muscle biopsies were snap-frozen  
94 and stored at  $-80$  °C. Muscle biopsies were collected at the Tampere Neuromuscular Research Center,  
95 Tampere University Hospital, Finland.

### 96 RNA extraction, selection, and library preparation

97 Muscle tissue homogenization steps were performed using SpeedMill PLUS (Analytik Jena AG,  
98 Germany). RNA was extracted with Qiagen RNeasy Plus Universal Mini Kit (Qiagen, Hilden,  
99 Germany) and treated with Invitrogen TURBO DNase buffer (ThermoFisher Scientific, MA, USA)  
100 according to the manufacturers' instructions. RNA was quantified and qualitatively assessed using  
101 High Sensitivity RNA ScreenTape (Agilent Technologies, CA, USA) on Agilent 4200 TapeStation  
102 system (Agilent Technologies).

103 Library preparations and sequencing were performed at Oxford Genomics Center, University of  
104 Oxford. For PolyA+ RNA selection, the NEBNext Ultra II Directional RNA Library Prep kit (E7760)  
105 for Illumina (NEB, Beverly, MA, USA) was used to prepare strand-specific RNA-seq libraries.  
106 Libraries were multiplexed and sequenced on HiSeq4000: 75bp paired-end sequencing (Illumina,  
107 CA, USA), and an average of ~47 million reads per sample were produced. Samples with enough  
108 RNA were used for library preparation for small RNA (< 200 nt) selection (18 IBM, nine amputees,  
109 and four TMD). NEBNext Small RNA Library Prep Set (E7330) for Illumina was used per the  
110 manufacturer's instructions (NEB). Libraries were multiplexed and sequenced on HiSeq2500: 50bp  
111 single-end sequencing (Illumina), and an average of ~10 million reads per sample were produced.

### 112 RNA-seq data pre-processing, QC, and alignment



113 Adapter sequences and low-quality bases were removed with fastp [21]. Trimmed sequences were  
114 then mapped with STAR 2.7.0d [22] (STAR, RRID: SCR\_004463) with index generated from  
115 Gencode.v29 human reference (release date 05.2018, based on ENSEMBL GRCh38.p12) and  
116 comprehensive gene annotation (primary assembly) using the STAR two-pass method according to  
117 the guidelines from the ENCODE project for alignment of long RNA (>200 nt) and small RNA (<200  
118 nt) data.

### 119 RNA-seq quantification and differential gene expression analysis

120 Uniquely mapped fragments were summarized and quantified (referred to as counts) by featureCounts  
121 [23] (featureCounts, RRID: SCR\_012919) using Gencode.v29 primary comprehensive gene  
122 annotation, which lists 58,780 RNAs including 19,969 protein-coding, 16,066 non-coding, and  
123 22,745 other types of RNAs (primary gene expression analysis). Separate quantification of counts for  
124 lncRNA (lncRNA analysis) was done using long non-coding RNA gene annotation from  
125 Gencode.v29 (a subset of the primary annotation). Quantification of counts for miRNAs (miRNA  
126 analysis) in 31 samples was done using miRBase human miRNA annotation (Release 22.1 October  
127 2018) [24]. Differential gene expression analysis was performed with DESeq2 [25] (v1.26.0)  
128 (DESeq2, RRID: SCR\_015687) in Rstudio (v1.2.5019) (RStudio, RRID: SCR\_000432) based on R  
129 (v3.6.3) (R Project for Statistical Computing, RRID: SCR\_001905). Counts were normalized with  
130 variance stabilizing transformation function within DESeq2. A principal component analysis (PCA)  
131 was performed on the gene expression data of the IBM samples compared to amputee and TMD  
132 groups. Further, pairwise comparisons between cohorts were performed using the Wald test. Log<sub>2</sub>  
133 fold changes (LFC) were shrunk using 'ashr' adaptive shrinkage estimation [26], and results were  
134 generated with default independent filtering for increasing power. Only genes with LFC values larger  
135 than  $\pm 1.5$  and a Benjamini-Hochberg adjusted p-value of  $\leq 0.01$  were considered further. Genes  
136 specifically dysregulated in IBM muscles were considered for downstream analysis.

### 137 Pathway analysis

138 Ingenuity Pathway Analysis (IPA, QIAGEN Inc.) (Ingenuity Pathway Analysis, RRID:  
139 SCR\_008653) was used for pathway analysis and enrichment analysis of the obtained differential  
140 gene expression data. Using Ingenuity Pathways Knowledge Base (Ingenuity Pathways Knowledge  
141 Base, RRID: SCR\_008117), IPA mapped and annotated genes to the pathways and predicted  
142 activation state based on the direction of changes comparing it with the change in the database.

143

## 144 Differential splicing analysis

145 To investigate differential usage of exons and splicing, independent of the differential gene  
146 expression analysis, we used QoRTS [27] java-based application (v1.3.6) (QoRTs, RRID:  
147 SCR\_018665) to prepare counts from exons and splice junctions (known and novel) from the aligned  
148 data. Downstream analysis of this data was performed using JunctionSeq [28] (v1.16.0) in R.  
149 JunctionSeq results produce a q-value (based on FDR) on gene-level analysis, which considers that  
150 one or more exon/junction in this gene is differentially used. A conservative q-value threshold of 0.01  
151 was used to select significant observations. IBM-specific differentially expressed genes and  
152 differentially spliced genes were compared (Fig. 1). Statistical over-enrichment analysis for Gene  
153 ontology terms in categories: Molecular function, biological process, and cellular component, was  
154 performed on results obtained from QoRTs/JunctionSeq using clusterProfiler [29] (clusterProfiler,  
155 RRID: SCR\_016884). Gene sets were compared using UpSet plot [30].

## 156 **Results**

### 157 Expression signature in IBM muscles

158 Fig. 1a shows the summarized workflow of the methodology. The PCA shown in Fig. 1b explains the  
159 differences between the three cohorts. Pairwise comparisons were performed to reduce the potential  
160 confounding effects of groups, which identified 2,288 and 302 genes specifically up- or down-  
161 regulated in the IBM cohort, respectively (Fig. 1c). Non-coding RNA analyses resulted in 497  
162 lncRNAs upregulated, 106 lncRNAs downregulated, 140 miRNAs upregulated, and 126 miRNAs  
163 explicitly downregulated in the IBM cohort compared to other groups. These IBM-specific  
164 dysregulated RNAs were used for downstream pathway analysis using IPA workflow. The top 15  
165 genes dysregulated specifically in IBM muscles, with their functional annotations and normalized  
166 expression in the different cohorts, are shown in Fig. 2.

### 167 Pathway analysis

168 We performed IPA workflow analysis on IBM-specific dysregulated genes to better understand the  
169 pathways and the upstream regulators associated with the observed expression dysregulation. Out of  
170 these, 2,588 genes, 596 lncRNAs, and 257 miRNAs mapped to the Ingenuity database. From the  
171 primary gene expression analysis, IPA identified 91 pathways as significantly altered. Table 1 shows  
172 a summary of the IPA results with the top identified pathways.

173 The top upstream regulators in both miRNA and lncRNA analysis are shown in table 2 and table 3,  
174 respectively. We identified an increased expression of the lncRNA *DNM3OS* (DNM3 antisense RNA)

175 and *MIAT* (Myocardial infarction associated transcript) from these analyses. IPA suggested this  
176 dysregulation may be due to *JDP2* (Jun Dimerization Protein 2) and *TARDBP* (TAR DNA Binding  
177 Protein), acting as an upstream regulator of *DNM3OS* and *MIAT* respectively (table 4).

#### 178 Dysregulation of calcium-related pathways in IBM muscles

179 IPA identified calcium-induced T lymphocyte apoptosis as one of the most significant pathways  
180 dysregulated in IBM muscles (table 1). Our IBM-specific dataset contained 69 genes with significant  
181 dysregulation out of the 232 genes annotated in this pathway. A part of this pathway, including the  
182 major players, is shown in Fig. 3. Another pathway outside the top results identified that 29 genes  
183 (29/208,  $p = 7.05E-03$ ) significantly dysregulated in our dataset are also involved in calcium  
184 signaling. These results prompted us to investigate further for calcium related issues in cellular  
185 signaling, and we found that IPA also detects dysregulation of the following processes, mobilization  
186 of  $Ca^{2+}$  (80 genes), the release of  $Ca^{2+}$  (33 genes), quantity of  $Ca^{2+}$  (51 genes) and flux of  $Ca^{2+}$  (51  
187 genes), as significantly disturbed in IBM muscles (table 4).

#### 188 Altered exon usage and splicing pattern in IBM muscles

189 To explore IBM-specific exon usage, we performed an independent transcriptome-wide differential  
190 splicing analysis in our three cohorts. We obtained a list of 1,271 differentially spliced genes in IBM  
191 from our differential splicing analysis. These transcripts either showed IBM-specific increased usage  
192 of a known junction or a known exon or contained a novel exon-exon junction resulting in an  
193 alternative isoform. To understand the diverse portfolio of mature mRNAs created from pre-mRNAs,  
194 we used gene ontology over-enrichment analysis on these 1,271 differentially spliced genes and  
195 identified the first splicing signature specific to IBM muscles. To understand the different classes  
196 over-represented in these genes, we performed statistical over-enrichment analysis using  
197 clusterProfiler for all three GO categories as seen in Fig. 4 a,b,c. Our analysis showed an enrichment  
198 of genes involved in the structure and organization of actin filaments assembly in IBM muscles and,  
199 interestingly, proteins involved in mRNA processing and metabolism.

200 We then compared the list of differentially spliced genes with differentially expressed genes in our  
201 analysis and found an overlap of 79 genes (Fig. 1d). Next, we wanted to observe the overlap between  
202 six different sets of genes, namely IBM specific differentially spliced genes, calcium-induced T  
203 Lymphocyte apoptosis, Mobilization of  $Ca^{2+}$ , Flux of  $Ca^{2+}$ , Quantity of  $Ca^{2+}$ , and Release of  $Ca^{2+}$   
204 (Fig. 4d). We observed 10 genes to be associated with calcium-related processes; *HLA-DPA1*, *HLA-*  
205 *DPB1*, and *HLA-DQB1* are associated with calcium-induced T Lymphocyte apoptosis, *ANXA1* is  
206 associated with mobilization, flux, and release of  $Ca^{2+}$ , *CCL4* is associated with mobilization, flux,

207 and quantity of  $\text{Ca}^{2+}$ , *GRK3* and *RARRES2* are associated with mobilization, *SH3KBP1* with flux, and  
208 *ITGAM* with the quantity of  $\text{Ca}^{2+}$ . In particular, one specific differentially spliced gene, *LCK*, is part  
209 of all six sets.

210 Fig. 5a shows the gene expression of *LCK* in three cohorts, with expression in IBM muscles being  
211 significantly higher than the others ( $\log_2\text{FC} = +2.86$ ,  $\text{padj}=3.50\text{E-}11$ , ranking = 355/2590).  
212 Additionally, Fig. 5b shows the differential splicing pattern observed in *LCK* in all three groups. The  
213 highlighted E016 corresponds to an alternative exon (chr1:32274818-32274992, GRCh38).

## 214 Discussion

215 In this study, we aimed to identify a more detailed IBM-specific molecular signature, using different  
216 RNA-seq based methods that can help us explore the inflammatory and degenerative parts in depth.  
217 Antigen-driven T-cell cytotoxicity is the most reproducible and plausible part of the complex  
218 molecular pathomechanism in IBM. However, it remains unknown what antigen drives this IBM-  
219 specific immune cascade.

220 As part of the RV pathology, accumulated proteins or the unfolded protein response have been  
221 hypothesized to prompt an immune reaction [5]. A recent unbiased proteomics study dissected these  
222 RVs in IBM [31]. Interestingly, the protein encoded by one of our top differentially expressed genes,  
223 *MYL4*, is also detected in the RVs in IBM along with *ANXA1*, which is both differentially expressed  
224 and differentially spliced in IBM muscles. In our study design, we considered TMD, another RV  
225 muscle disease but without immune involvement, to understand if there are any RV-specific antigens  
226 in IBM muscles. Additionally, using age-matched histopathologically normal muscles from  
227 amputees, we aimed to understand if general inflammatory signatures can be replicated and studied  
228 in more detail using additional methods such as non-coding RNAs and differential splicing studies.  
229 Consequently, our strong study design and robust methodology helped us replicate findings from  
230 previous studies [11-17] and identify essentially new calcium-related issues in IBM muscles and their  
231 link with the altered T-cell cytotoxicity in IBM muscle fibers.

232 We found that several genes contributing to calcium homeostasis are differentially expressed in IBM  
233 muscles resulting in dysregulation of several critical pathways, specifically, calcium-induced T  
234 lymphocyte apoptosis and related Nur77 signaling.  $\text{Ca}^{2+}$  is a universal second messenger in T cells,  
235 and it is known to regulate proliferation and differentiation of T cells and T-cell effector functions  
236 [32]. The complexity and duration of  $\text{Ca}^{2+}$  signals and resultant cytoskeletal rearrangements  
237 determine the fate of T cells in response to an antigen [33]. On one hand, a short-term increase in  
238 intracellular  $\text{Ca}^{2+}$  concentration results in the cytolytic activity of T cells; on the other hand, prolonged

239 elevation results in proliferation, differentiation, and maturation of naïve T cells into Th1, Th2, and  
240 Th17 subtypes and the production of cytokines[32].

241  $Ca^{2+}$  signaling is known to optimize the interaction between T cells and antigen-presenting cells [33].  
242 The binding of antigen/MHC complexes ( $CD8^+$ -MHC class I/ $CD4^+$ -MHC class II) to T-cell receptors  
243 (TCR) activates Src-family protein tyrosine kinases, e.g., LCK and FYN at the cytoplasmic side of  
244 the TCR/CD3 complex. Additionally, activation of ZAP-70, a tyrosine kinase associate protein,  
245 results in the phosphorylation and activation of the intracellular enzyme phospholipase C- $\gamma$ 1 (PLC-  
246  $\gamma$ 1) [32, 33]. PLC- $\gamma$ 1 hydrolyses phosphatidylinositol 4,5-biphosphate (PIP2) to produce two other  
247 second messengers, inositol 1,4,5-triphosphate (IP3) and diacylglycerol (DAG). IP3 binds to its  
248 receptor (IP3R) on the endoplasmic reticulum (ER) membrane to promote rapid release of  $Ca^{2+}$  from  
249 ER to the cytosol [32]. However, this release of  $Ca^{2+}$  is insufficient for antigen-derived T-cell fate  
250 but results in depletion of intracellular  $Ca^{2+}$  triggering a rapid influx of  $Ca^{2+}$  through activation and  
251 opening of  $Ca^{2+}$  release- $Ca^{2+}$  activated channels (CRAC) on the plasma membrane formed by  
252 different STIM1/ORAI1 combinations [34]. The duration of  $Ca^{2+}$  influx is vital for activating the  
253 calcineurin-dependent nuclear factor activate T cells (NFAT) transcription pathway [32]. In the  
254 cytoplasm, calcineurin removes excess phosphate residues from the N terminus of NFAT, promoting  
255 its entry into the nucleus. Disruptions in NFAT signaling can cause several phenotypes, including  
256 cardiovascular, musculoskeletal, and immunological diseases [35]. Meanwhile, DAG, another  
257 secondary messenger, activates protein kinase C (PKC), which in turn activates the nuclear factor  
258 kappa B (NF $\kappa$ B). The duration and complexity of  $Ca^{2+}$  signals drive the NFAT/NF $\kappa$ B signaling and  
259 determine downstream T-cell activation.

260 The genes in the NR4A family (NR4A1/Nur77, NR4A2/Nurr1, NR4A3/Nor1) act as critical  
261 molecular switches in cell survival and inflammation. Human *NR4A1* encodes for a homolog of a  
262 mouse protein called Nur77, a zinc transcription factor expressed as an early gene in T cells upon  
263 antigen-TCR interaction. In addition to being a transcriptional activator, Nur77 has an apoptotic role  
264 in T regulatory fate [36] and other non-genomic proapoptotic functions via mitochondrial interactions  
265 with Bcl-2 [37]. T cells deficient in Nur77 have been shown to have high proliferation, enhanced T-  
266 cell activation, and increased susceptibility for T-cell-mediated inflammatory diseases [38]. The  
267 expression of Nur77 is  $Ca^{2+}$  dependent and is controlled by the myocyte enhancer factor 2 (MEF2)  
268 transcription factor [39], whose DNA-binding and transcriptional activity is enhanced by Calcineurin.  
269 Another calcium-dependent transcription factor, CABIN1, acts as a transcriptional repressor of  
270 MEF2, thus keeping the Nur77 promoter silent in the absence of a TCR signal [40]. The interaction  
271 between CABIN1 and calcineurin is influenced by intracellular  $Ca^{2+}$  and PKC activation, resulting in

272 hyperphosphorylation of CABIN1 and its subsequent transcription repressing activity. An increase in  
273 intracellular  $Ca^{2+}$  concentration activates the interaction of the calmodulin family of genes (CALM)  
274 with CABIN1, triggering the dissociation of MEF2 from Cabin and MEF2 to become  
275 transcriptionally active [41]. In the nucleus, NFAT interacts with MEF2 and enhances its  
276 transcriptional activity by recruiting the co-activator p300 for the transcription of Nur77.

277 In our dataset, 69 genes mapping to the calcium-induced T Lymphocyte apoptosis and 72 genes  
278 mapping the Nur77 signaling in T Lymphocytes are differentially expressed in IBM muscles. As seen  
279 in Fig. 3, several essential genes like *ZAP70*, *LCK*, different subunits of Protein Kinase C, and  
280 *ATP2A1* which encodes for SERCA, are significantly changed in IBM muscles. Additionally, we also  
281 observed genes associated with the mobilization of  $Ca^{2+}$ , the release of  $Ca^{2+}$ , the quantity of  $Ca^{2+}$ , and  
282 the flux of  $Ca^{2+}$  as significantly dysregulated in IBM muscles, indicating a possible widespread  
283 disturbance with the handling of calcium entry and release in cells. In T cells, especially, this  
284 disturbance could dramatically impact their activation, differentiation, and most likely, the regulation  
285 of T-cell apoptosis will be disturbed.

286 Apoptosis in T cells is necessary to resolve their inflammatory activity, and defective or delayed  
287 apoptosis may contribute to the pathogenesis of inflammatory diseases [42]. In this scenario, loss of  
288 apoptotic control could be one mechanism explaining the lack of immune-suppressive therapeutic  
289 effect in IBM [43].

290 The diversity of the skeletal muscle proteome is, among others, dependent on the diversity of exon  
291 usage in pre-mRNAs [44]. From our transcriptome-wide splicing analysis within the differentially  
292 expressed genes, we identified 79 genes, out of which ten are associated with different calcium-  
293 related functions. Amongst these, *LCK* is a T lymphocyte-specific protein tyrosine kinase involved  
294 in downstream events of antigen-TCR interaction. *LCK/p56* is essential in transducing signals  
295 leading to apoptotic cell death in mature T cells [45], and its activity is tightly regulated to protect  
296 against hyperactivation of T cells and autoimmunity, thus maintaining T-cell homeostasis [46].  
297 Moreover, *LCK* also selectively influences the flux and release of calcium in cells [47]. In our  
298 analysis, *LCK* is both differentially expressed and differentially spliced in IBM muscles. Disturbed  
299 T-cell apoptosis and the dysregulation of *LCK* in IBM muscles provide novel insights into the  
300 molecular mechanisms of IBM. Considering the crucial regulatory activity of *LCK*, it might be a  
301 potential therapeutic target for IBM patients.

302 We also observe dysregulation of several non-coding RNAs in our study. Previously, Hamann and  
303 colleagues have discussed lncRNAs in the context of IBM [13]. The benefits of our study design,



304 especially the homogenous molecular pathology and the larger sample size, let us dig deeper into the  
305 dysregulation of lncRNAs specific to IBM muscles. We identified that JDP2 (DNA binding  
306 transcription factor) and TARDBP/TDP-43 (DNA and RNA binding protein) might have altered  
307 regulator activity since their downstream non-coding partners (*DNM3OS* and *MIAT*, respectively) are  
308 significantly overexpressed IBM muscles. Additionally, both these proteins are specific to RNA  
309 polymerase II (RNA Pol II), facilitating transcription and pre-mRNA maturation. Alteration in RNA  
310 or DNA binding proteins (expression or localization) associated with the activity of the spliceosome  
311 machinery can directly affect the downstream events. Since TDP-43 is accumulated in RVs, one  
312 possibility is that the unavailability of TDP-43 can affect its transcription and splicing activities. The  
313 normal expression of *TARDBP* we observe in IBM patients is expected and is in coherence with the  
314 previous reports [48]. In inherited muscle diseases, damaging variants in the disease-associated gene  
315 can result in mislocalization and accumulation of mutant protein in the muscle fibers. Previous studies  
316 have reported rare exonic variants in genes, including *VCP* and *SQSTM1* in IBM [49, 50]. However,  
317 in our cohort of IBM patients, there were no rare exonic *TARDBP*, *VCP*, or *SQSTM1* variants [9] that  
318 could suggest a possible association with abnormal protein turnover and accumulation/aggregation.  
319 Therefore, further evidence to suggest the pathogenic role of variants in such genes and their  
320 downstream effect on pathological protein accumulation in IBM is still missing. However, the  
321 potential downside of TDP-43 not being available for its traditional roles, such as effective splicing,  
322 because of the aggregation is noteworthy. Further evidence of possible dysregulation of splicing in  
323 IBM muscles comes from our differential splicing results where proteins involved in mRNA  
324 processing, transcription, and regulation are enriched, suggesting that additional studies are needed  
325 to understand the possible impact of dysregulated mRNA processing in IBM muscles.

326 Previously, Pinal-Fernandez and colleagues observed that calcium-induced T lymphocyte apoptosis  
327 was a significant IBM-specific dysregulated pathway in their extensive analysis of different  
328 inflammatory myopathies but did not comment further on the possible importance [17]. Additionally,  
329 using a smaller sample size, Amici and colleagues identified calcium signaling as one of the  
330 significant disturbed pathways in IBM muscles and hypothesized its potential major role [14].  
331 Furthermore, previous gene expression studies in IBM have analyzed data primarily from microarrays  
332 [11, 12, 15]. Only recently paired-end reads RNA-seq have been used in IBM studies [13, 14, 16, 17].  
333 While microarray-based analyses are comparable for differential expression studies, RNA-seq based  
334 methodologies are superior for in-depth transcriptome analysis. In our study design, we used matched  
335 muscle biopsies and state-of-the-art RNA-seq analysis tools. Our analyses show novel molecular  
336 events in IBM muscles which increase our understanding of IBM and provide valuable additions to

337 improve the therapeutic interventions considering the disturbed calcium homeostasis, dysregulation  
338 of LCK, and associated deregulation of apoptotic control of T cells in IBM muscles.

## 339 **Acknowledgments**

340 The authors would like to thank the patients and their families. We thank the Oxford Genomics Centre  
341 at the Wellcome Centre for Human Genetics (funded by Wellcome Trust grant reference  
342 203141/Z/16/Z) for the generation and initial processing of the sequencing data. We would like to  
343 thank CSC – IT Center for Science, Finland, for its computational resources. We thank Merja  
344 Soininen, Talha Qureshi and Eini Penkkimäki for their technical assistance. We would like to thank  
345 Peter-Bram 't Hoen for his critical review of this manuscript.

## 346 **Declarations**

### 347 Funding

348 This work was supported by the Folkhälsan Research Foundation, Doctoral program in Integrative  
349 Life Science (ILS) and Doctoral school in Health Sciences (DSHealth), University of Helsinki (MJ),  
350 the Päivikki and Sakari Sohlberg Foundation (MJ), the Biomedicum Helsinki Foundation (MJ),  
351 Finska läkaresällskapet (BU/MJ), the Finnish Medical Foundation (JP), the Paulo foundation (MS),  
352 the Jane and Aatos Erkko Foundation (PH) and the Sigrid Jusélius Foundation (BU).

### 353 Author Contributions

354 MJ: Conceptualization of the study, funding acquisition, data analysis and curation, methodology,  
355 project administration, visualization, writing the original draft, review, and editing of the  
356 manuscript.

357 AV: data analysis, methodology, writing the original draft.

358 JP: Patient samples and data collection, writing the original draft.

359 MJ: Patient samples and data collection, review, and editing of the manuscript.

360 PH.J.: Conceptualization of the methodology, review, and editing of the manuscript.

361 JS: Data analysis, review, and editing of the manuscript.

362 SH: Patient samples and data collection, review, and editing of the manuscript.

363 MS: Conceptualization of the study and methodology, review and editing of the manuscript.

364 PH: Funding acquisition, project administration, and review and editing of the manuscript.

365 BU.: Conceptualization of the study, funding acquisition, supervision, project administration,  
366 review, and editing of the manuscript.



367 Conflicts of interest

368 The authors report no conflicts of interest.

369 Ethical approval

370 The study was performed in line with the principles of the Declaration of Helsinki. Ethical approval  
371 for this study falls under HUS:195/13/03/00/11. Informed consent from the patients was obtained at  
372 the time of sample collection.

373 Data availability

374 Raw counts and normalized DESeq2 counts from polyA+ RNAs and miRNAs are available in GEO  
375 as superseries GSE151758.

376

## 377 **References**

- 378 [1]. Ikenaga C, Kubota A, Kadoya M, *et al.* Clinicopathologic features  
379 of myositis patients with CD8-MHC-1 complex pathology. *Neurology*. 2017  
380 **89**: 1060-1068. <https://doi.org/10.1212/WNL.0000000000004333>
- 381 [2]. Dalakas MC, Koffman B, Fujii M, Spector S, Sivakumar K, Cupler  
382 E. A controlled study of intravenous immunoglobulin combined with  
383 prednisone in the treatment of IBM. *Neurology*. 2001 **56**: 323-327.  
384 <https://doi.org/10.1212/wnl.56.3.323>
- 385 [3]. Cai H, Yabe I, Sato K, *et al.* Clinical, pathological, and genetic  
386 mutation analysis of sporadic inclusion body myositis in Japanese people. *J*  
387 *Neurol*. 2012 **259**: 1913-1922. <https://doi.org/10.1007/s00415-012-6439-0>
- 388 [4]. Askanas V, Engel WK. Sporadic inclusion-body myositis: a  
389 proposed key pathogenetic role of the abnormalities of the ubiquitin-  
390 proteasome system, and protein misfolding and aggregation. *Acta Myol*.  
391 2005 **24**: 17-24.
- 392 [5]. Askanas V, Engel WK. Sporadic inclusion-body myositis and  
393 hereditary inclusion-body myopathies: current concepts of diagnosis and  
394 pathogenesis. *Curr Opin Rheumatol*. 1998 **10**: 530-542.  
395 <https://doi.org/10.1097/00002281-199811000-00005>
- 396 [6]. Greenberg SA. Theories of the pathogenesis of inclusion body  
397 myositis. *Curr Rheumatol Rep*. 2010 **12**: 221-228.  
398 <https://doi.org/10.1007/s11926-010-0102-5>
- 399 [7]. Hiniker A, Daniels BH, Margeta M. T-Cell-Mediated Inflammatory  
400 Myopathies in HIV-Positive Individuals: A Histologic Study of 19 Cases. *J*  
401 *Neuropathol Exp Neurol*. 2016 **75**: 239-245.  
402 <https://doi.org/10.1093/jnen/nlv023>
- 403 [8]. Amato AA, Shebert RT. Inclusion body myositis in twins.  
404 *Neurology*. 1998 **51**: 598-600. <https://doi.org/10.1212/wnl.51.2.598>
- 405 [9]. Johari M, Arumilli M, Palmio J, *et al.* Association study reveals  
406 novel risk loci for sporadic inclusion body myositis. *Eur J Neurol*. 2017 **24**:  
407 572-577. <https://doi.org/10.1111/ene.13244>
- 408 [10]. Rothwell S, Chinoy H, Lamb JA, *et al.* Focused HLA analysis in  
409 Caucasians with myositis identifies significant associations with  
410 autoantibody subgroups. *Annals of the Rheumatic Diseases*. 2019 **78**: 996-  
411 1002. <https://doi.org/10.1136/annrheumdis-2019-215046>

- 412 [11]. Greenberg SA, Sanoudou D, Haslett JN, *et al.* Molecular profiles  
413 of inflammatory myopathies. *Neurology*. 2002 **59**: 1170-1182.  
414 <https://doi.org/10.1212/wnl.59.8.1170>
- 415 [12]. Eisenberg I, Eran A, Nishino I, *et al.* Distinctive patterns of  
416 microRNA expression in primary muscular disorders. *Proc Natl Acad Sci U S*  
417 *A*. 2007 **104**: 17016-17021. <https://doi.org/10.1073/pnas.0708115104>
- 418 [13]. Hamann PD, Roux BT, Heward JA, *et al.* Transcriptional profiling  
419 identifies differential expression of long non-coding RNAs in Jo-1  
420 associated and inclusion body myositis. *Sci Rep*. 2017 **7**: 8024.  
421 <https://doi.org/10.1038/s41598-017-08603-9>
- 422 [14]. Amici DR, Pinal-Fernandez I, Mazala DA, *et al.* Calcium  
423 dysregulation, functional calpainopathy, and endoplasmic reticulum stress  
424 in sporadic inclusion body myositis. *Acta Neuropathol Commun*. 2017 **5**:  
425 24. <https://doi.org/10.1186/s40478-017-0427-7>
- 426 [15]. Greenberg SA, Pinkus JL, Kong SW, Baecher-Allan C, Amato AA,  
427 Dorfman DM. Highly differentiated cytotoxic T cells in inclusion body  
428 myositis. *Brain*. 2019 **142**: 2590-2604.  
429 <https://doi.org/10.1093/brain/awz207>
- 430 [16]. Pinal-Fernandez I, Casal-Dominguez M, Derfoul A, *et al.*  
431 Identification of distinctive interferon gene signatures in different types of  
432 myositis. *Neurology*. 2019 **93**: e1193-e1204.  
433 <https://doi.org/10.1212/WNL.00000000000008128>
- 434 [17]. Pinal-Fernandez I, Casal-Dominguez M, Derfoul A, *et al.* Machine  
435 learning algorithms reveal unique gene expression profiles in muscle  
436 biopsies from patients with different types of myositis. *Ann Rheum Dis*.  
437 2020 **79**: 1234-1242. <https://doi.org/10.1136/annrheumdis-2019-216599>
- 438 [18]. Rose MR, Group EIW. 188th ENMC International Workshop:  
439 Inclusion Body Myositis, 2-4 December 2011, Naarden, The Netherlands.  
440 *Neuromuscul Disord*. 2013 **23**: 1044-1055.  
441 <https://doi.org/10.1016/j.nmd.2013.08.007>
- 442 [19]. Hackman P, Vihola A, Haravuori H, *et al.* Tibial muscular  
443 dystrophy is a titinopathy caused by mutations in TTN, the gene encoding  
444 the giant skeletal-muscle protein titin. *Am J Hum Genet*. 2002 **71**: 492-500.  
445 <https://doi.org/10.1086/342380>

- 446 [20]. Huovinen S, Penttila S, Somervuo P, *et al.* Differential isoform  
447 expression and selective muscle involvement in muscular dystrophies. *Am*  
448 *J Pathol.* 2015 **185**: 2833-2842.  
449 <https://doi.org/10.1016/j.ajpath.2015.06.018>
- 450 [21]. Chen S, Zhou Y, Chen Y, Gu J. fastp: an ultra-fast all-in-one  
451 FASTQ preprocessor. *Bioinformatics.* 2018 **34**: i884-i890.  
452 <https://doi.org/10.1093/bioinformatics/bty560>
- 453 [22]. Dobin A, Davis CA, Schlesinger F, *et al.* STAR: ultrafast universal  
454 RNA-seq aligner. *Bioinformatics.* 2013 **29**: 15-21.  
455 <https://doi.org/10.1093/bioinformatics/bts635>
- 456 [23]. Liao Y, Smyth GK, Shi W. featureCounts: an efficient general  
457 purpose program for assigning sequence reads to genomic features.  
458 *Bioinformatics.* 2014 **30**: 923-930.  
459 <https://doi.org/10.1093/bioinformatics/btt656>
- 460 [24]. Griffiths-Jones S. The microRNA Registry. *Nucleic Acids Res.* 2004  
461 **32**: D109-111. <https://doi.org/10.1093/nar/gkh023>
- 462 [25]. Love MI, Huber W, Anders S. Moderated estimation of fold  
463 change and dispersion for RNA-seq data with DESeq2. *Genome Biol.* 2014  
464 **15**: 550. <https://doi.org/10.1186/s13059-014-0550-8>
- 465 [26]. Stephens M. False discovery rates: a new deal. *Biostatistics.*  
466 2016 **18**: 275-294. <https://doi.org/10.1093/biostatistics/kxw041>
- 467 [27]. Hartley SW, Mullikin JC. QoRTs: a comprehensive toolset for  
468 quality control and data processing of RNA-Seq experiments. *BMC*  
469 *Bioinformatics.* 2015 **16**: 224. <https://doi.org/10.1186/s12859-015-0670-5>
- 470 [28]. Hartley SW, Mullikin JC. Detection and visualization of  
471 differential splicing in RNA-Seq data with JunctionSeq. *Nucleic Acids Res.*  
472 2016 **44**: e127. <https://doi.org/10.1093/nar/gkw501>
- 473 [29]. Yu G, Wang LG, Han Y, He QY. clusterProfiler: an R package for  
474 comparing biological themes among gene clusters. *OMICS.* 2012 **16**: 284-  
475 287. <https://doi.org/10.1089/omi.2011.0118>
- 476 [30]. Lex A, Gehlenborg N, Strobel H, Vuillemot R, Pfister H. UpSet:  
477 Visualization of Intersecting Sets. *IEEE Trans Vis Comput Graph.* 2014 **20**:  
478 1983-1992. <https://doi.org/10.1109/TVCG.2014.2346248>

- 479 [31]. Güttches A-K, Brady S, Krause K, *et al.* Proteomics of rimmed  
480 vacuoles define new risk allele in inclusion body myositis. *Annals of*  
481 *Neurology*. 2017 **81**: 227-239. <https://doi.org/10.1002/ana.24847>
- 482 [32]. Joseph N, Reicher B, Barda-Saad M. The calcium feedback loop  
483 and T cell activation: how cytoskeleton networks control intracellular  
484 calcium flux. *Biochim Biophys Acta*. 2014 **1838**: 557-568.  
485 <https://doi.org/10.1016/j.bbamem.2013.07.009>
- 486 [33]. Lewis RS. Calcium signaling mechanisms in T lymphocytes. *Annu*  
487 *Rev Immunol*. 2001 **19**: 497-521.  
488 <https://doi.org/10.1146/annurev.immunol.19.1.497>
- 489 [34]. Qu B, Al-Ansary D, Kummerow C, Hoth M, Schwarz EC. ORAI-  
490 mediated calcium influx in T cell proliferation, apoptosis and tolerance. *Cell*  
491 *Calcium*. 2011 **50**: 261-269. <https://doi.org/10.1016/j.ceca.2011.05.015>
- 492 [35]. Crabtree GR, Olson EN. NFAT signaling: choreographing the  
493 social lives of cells. *Cell*. 2002 **109 Suppl**: S67-79.  
494 [https://doi.org/10.1016/s0092-8674\(02\)00699-2](https://doi.org/10.1016/s0092-8674(02)00699-2)
- 495 [36]. Calnan BJ, Szychowski S, Chan FK, Cado D, Winoto A. A role for  
496 the orphan steroid receptor Nur77 in apoptosis accompanying antigen-  
497 induced negative selection. *Immunity*. 1995 **3**: 273-282.  
498 [https://doi.org/10.1016/1074-7613\(95\)90113-2](https://doi.org/10.1016/1074-7613(95)90113-2)
- 499 [37]. Thompson J, Winoto A. During negative selection, Nur77 family  
500 proteins translocate to mitochondria where they associate with Bcl-2 and  
501 expose its proapoptotic BH3 domain. *J Exp Med*. 2008 **205**: 1029-1036.  
502 <https://doi.org/10.1084/jem.20080101>
- 503 [38]. Liebmann M, Hucke S, Koch K, *et al.* Nur77 serves as a molecular  
504 brake of the metabolic switch during T cell activation to restrict  
505 autoimmunity. *Proceedings of the National Academy of Sciences*. 2018  
506 **115**: E8017-E8026. <https://doi.org/10.1073/pnas.1721049115>
- 507 [39]. Youn HD, Chatila TA, Liu JO. Integration of calcineurin and MEF2  
508 signals by the coactivator p300 during T-cell apoptosis. *The EMBO journal*.  
509 2000 **19**: 4323-4331. <https://doi.org/10.1093/emboj/19.16.4323>
- 510 [40]. Youn HD, Liu JO. Cabin1 represses MEF2-dependent Nur77  
511 expression and T cell apoptosis by controlling association of histone  
512 deacetylases and acetylases with MEF2. *Immunity*. 2000 **13**: 85-94.  
513 [https://doi.org/10.1016/s1074-7613\(00\)00010-8](https://doi.org/10.1016/s1074-7613(00)00010-8)

- 514 [41]. Palmer E. Negative selection--clearing out the bad apples from  
515 the T-cell repertoire. *Nat Rev Immunol*. 2003 **3**: 383-391.  
516 <https://doi.org/10.1038/nri1085>
- 517 [42]. Raza K, Scheel-Toellner D, Lee CY, *et al*. Synovial fluid leukocyte  
518 apoptosis is inhibited in patients with very early rheumatoid arthritis.  
519 *Arthritis Res Ther*. 2006 **8**: R120. <https://doi.org/10.1186/ar2009>
- 520 [43]. Greenberg SA. Inclusion body myositis: clinical features and  
521 pathogenesis. *Nat Rev Rheumatol*. 2019 **15**: 257-272.  
522 <https://doi.org/10.1038/s41584-019-0186-x>
- 523 [44]. Nakka K, Ghigna C, Gabellini D, Dilworth FJ. Diversification of the  
524 muscle proteome through alternative splicing. *Skeletal Muscle*. 2018 **8**: 8.  
525 <https://doi.org/10.1186/s13395-018-0152-3>
- 526 [45]. Yu X-Z, Levin SD, Madrenas J, Anasetti C. Lck Is Required for  
527 Activation-Induced T Cell Death after TCR Ligation with Partial Agonists.  
528 *The Journal of Immunology*. 2004 **172**: 1437-1443.  
529 <https://doi.org/10.4049/jimmunol.172.3.1437>
- 530 [46]. McNeill L, Salmond RJ, Cooper JC, *et al*. The differential  
531 regulation of Lck kinase phosphorylation sites by CD45 is critical for T cell  
532 receptor signaling responses. *Immunity*. 2007 **27**: 425-437.  
533 <https://doi.org/10.1016/j.immuni.2007.07.015>
- 534 [47]. Thompson JL, Shuttleworth TJ. A plasma membrane-targeted  
535 cytosolic domain of STIM1 selectively activates ARC channels, an  
536 arachidonate-regulated store-independent Orai channel. *Channels (Austin, Tex)*. 2012 **6**: 370-378. <https://doi.org/10.4161/chan.21947>
- 537 [48]. Cortese A, Plagnol V, Brady S, *et al*. Widespread RNA metabolism  
538 impairment in sporadic inclusion body myositis TDP43-proteinopathy.  
539 *Neurobiol Aging*. 2014 **35**: 1491-1498.  
540 <https://doi.org/10.1016/j.neurobiolaging.2013.12.029>
- 541 [49]. Wehl CC, Baloh RH, Lee Y, *et al*. Targeted sequencing and  
542 identification of genetic variants in sporadic inclusion body myositis.  
543 *Neuromuscul Disord*. 2015 **25**: 289-296.  
544 <https://doi.org/10.1016/j.nmd.2014.12.009>
- 545 [50]. Gang Q, Bettencourt C, Machado PM, *et al*. Rare variants in  
546 SQSTM1 and VCP genes and risk of sporadic inclusion body myositis.  
547

548 *Neurobiol Aging*. 2016 **47**: 218 e211-218 e219.

549 <https://doi.org/10.1016/j.neurobiolaging.2016.07.024>

550



## 551 **Figures legends**

552 **Fig. 1** a) Workflow and methodology used in this study. b) Principal component analysis of gene  
553 expression results showing the pairwise comparison between different groups: IBM, TMD and  
554 Amputees. c) IBM-specific differentially expressed genes were determined by comparing IBM cases  
555 with amputee and TMD groups. d) Comparison between IBM specific differentially expressed genes  
556 (cyan) and IBM specific differentially spliced genes (magenta).

557

558 **Fig. 2** a) Top 15 differentially expressed genes specific to IBM muscles. Log<sub>2</sub> fold change (log<sub>2</sub>FC)  
559 of IBM versus amputees calculated by DEseq2 after shrinkage estimations. '+'/'-' sign denotes the  
560 direction of change, i.e., positive log<sub>2</sub>FC values indicate overexpressed genes in IBM muscles, and  
561 negative log<sub>2</sub>FC values indicate underexpressed genes in IBM muscles. The p-value of significance  
562 and adjusted p-value using the Benjamini-Hochberg corrections and associated GO terms are shown  
563 for each gene. Genes marked with \* are also observed as significantly dysregulated in Hamann et al.  
564 [13] b) Normalized gene expression in the different cohorts is presented as boxplots. Median and  
565 quartile values are shown, with whiskers reaching up to 1.5 times the interquartile range. Individual  
566 expression levels are shown as jitter points. The raincloud plots illustrate the distribution of data in  
567 each cohort. The scaled Y-axis shows log normalized counts.

568

569 **Fig. 3** The calcium-induced T lymphocyte apoptosis pathway with gene expression changes observed  
570 in IBM compared to groups. Created with BioRender.com

571

572 **Fig. 4** Statistical over-representation tests were performed on a list of differentially spliced RNAs,  
573 using clusterProfiler for a) Biological Processes, b) Cellular component, and c) Molecular function.  
574 d) An UpSet plot is shown comparing six different sets, namely, IBM specific differentially spliced  
575 (1,271 genes), mobilization of Ca<sup>2+</sup> (80 genes), calcium-induced T lymphocyte apoptosis (69 genes),  
576 the flux of Ca<sup>2+</sup> (51 genes), quantity of Ca<sup>2+</sup> (51 genes), and release of Ca<sup>2+</sup> (33 genes). Dots and lines  
577 represent subsets of different lists. The horizontal bar graph (wine color) represents the size of each  
578 set, while the vertical histogram (black) represents the number of RNAs in each subset. The 10 RNAs  
579 that are both differentially expressed and differentially spliced are shown with a red circle with their  
580 gene names (black).

581

582 **Fig. 5** a) Normalized LCK expression in the different cohorts (as explained in Fig. 2b). b) Altered  
583 isoform expression of *LCK* using JunctionSeq showing estimated normalized mean read-pair count  
584 for each exon and splice junctions in the different cohorts (left) as well as for the whole *LCK* gene  
585 (right). The significantly alternatively spliced feature, E016 (pink), corresponds to chr1:32274818-  
586 32274992 (GRCh38). The alternative *LCK* transcripts used in the JunctionSeq analysis are shown  
587 below with their corresponding ENSEMBL identifiers.

588



589 **Tables**

590

591 Table 1: Top 10 dysregulated canonical pathways identified by IPA. The significance of the  
 592 identified pathway is shown with a p-value and the number of differentially expressed genes  
 593 observed in the IBM-specific dataset compared to the number of genes present in the database for  
 594 each pathway.

| Ingenuity Canonical Pathways                             | p-value  | Number of genes in dataset / Number of genes in database |
|----------------------------------------------------------|----------|----------------------------------------------------------|
| <b>Dendritic Cell Maturation</b>                         | 5.72E-31 | 106/357                                                  |
| <b>T Cell Receptor Signaling</b>                         | 2.30E-25 | 97/355                                                   |
| <b>T Cell Exhaustion Signaling Pathway</b>               | 3.12E-25 | 94/338                                                   |
| <b>Cdc42 Signaling</b>                                   | 7.63E-24 | 88/315                                                   |
| <b>iCOS-iCOSL Signaling in T Helper Cells</b>            | 4.10E-23 | 81/280                                                   |
| <b>CD28 Signaling in T Helper Cells</b>                  | 1.13E-22 | 82/290                                                   |
| <b>OX40 Signaling Pathway</b>                            | 4.03E-21 | 68/222                                                   |
| <b>Calcium-induced T Lymphocyte Apoptosis</b>            | 1.29E-20 | 69/232                                                   |
| <b>Nur77 Signaling in T Lymphocytes</b>                  | 3.07E-20 | 72/253                                                   |
| <b>Role of NFAT in Regulation of the Immune Response</b> | 4.57E-19 | 87/360                                                   |

595

596 Table 2: From the miRNA analysis, upstream binding partners are shown along with their target  
 597 miRNA. A p-value and associated GO terms are shown.

| Upstream regulator        | p-value  | GO terms and annotations                                      |
|---------------------------|----------|---------------------------------------------------------------|
| <b><i>AGO2</i></b>        | 7.89E-23 | RNA polymerase II complex binding                             |
| <b><i>SSB</i></b>         | 4.74E-19 | RNA binding                                                   |
| <b><i>TP53</i></b>        | 7.59E-09 | Transcription regulatory region sequence-specific DNA binding |
| <b>RNA polymerase III</b> | 4.09E-06 | Synthesis of small RNA, RNA polymerase activity               |

598

599

600 Table 3: From the long non-coding RNA analysis, upstream binding partners are shown along with  
 601 their target lncRNA. A p-value and associated GO terms are shown

| Upstream regulator | Target molecule in dataset | p-value  | GO terms and annotations                                                                                                                                     |
|--------------------|----------------------------|----------|--------------------------------------------------------------------------------------------------------------------------------------------------------------|
| <b>JDP2</b>        | <i>DNM3OS</i>              | 4.10E-03 | DNA-binding transcription factor activity, RNA polymerase II-specific                                                                                        |
| <b>miR-338-3p</b>  | <i>NR2F1-AS1</i>           | 4.10E-03 | Negative regulation of gene expression; negative regulation of IL-6 production; negative regulation of cytokine production involved in inflammatory response |
| <b>miR-150-5p</b>  | <i>MIAT</i>                | 4.10E-03 | mRNA binding involved in posttranscriptional gene silencing                                                                                                  |
| <b>TARDBP</b>      | <i>MIAT</i>                | 2.03E-02 | RNA polymerase II cis-regulatory region sequence-specific DNA binding                                                                                        |
| <b>mir-150</b>     | <i>MIAT</i>                | 2.63E-02 | mRNA binding involved in posttranscriptional gene silencing                                                                                                  |
| <b>PGF</b>         | <i>DNM3OS</i>              | 3.43E-02 | Protein binding, signal transduction                                                                                                                         |
| <b>FUS</b>         | <i>RMRP</i>                | 3.43E-02 | mRNA binding, mRNA stabilization                                                                                                                             |
| <b>DDX58</b>       | <i>EGOT</i>                | 4.61E-02 | double-stranded RNA binding                                                                                                                                  |

602

603 Table 4: In cell signaling processes, different pathways associated with calcium homeostasis are  
 604 shown along with their p-value and a prediction state.

| Functional annotations                 | p-value  | Predicted activation state |
|----------------------------------------|----------|----------------------------|
| <b>Mobilization of Ca<sup>2+</sup></b> | 5.04E-26 | Increased                  |
| <b>Flux of Ca<sup>2+</sup></b>         | 4.68E-13 | Increased                  |
| <b>Quantity of Ca<sup>2+</sup></b>     | 4.34E-09 | Increased                  |
| <b>Release of Ca<sup>2+</sup></b>      | 5.00E-09 | Increased                  |

605

a

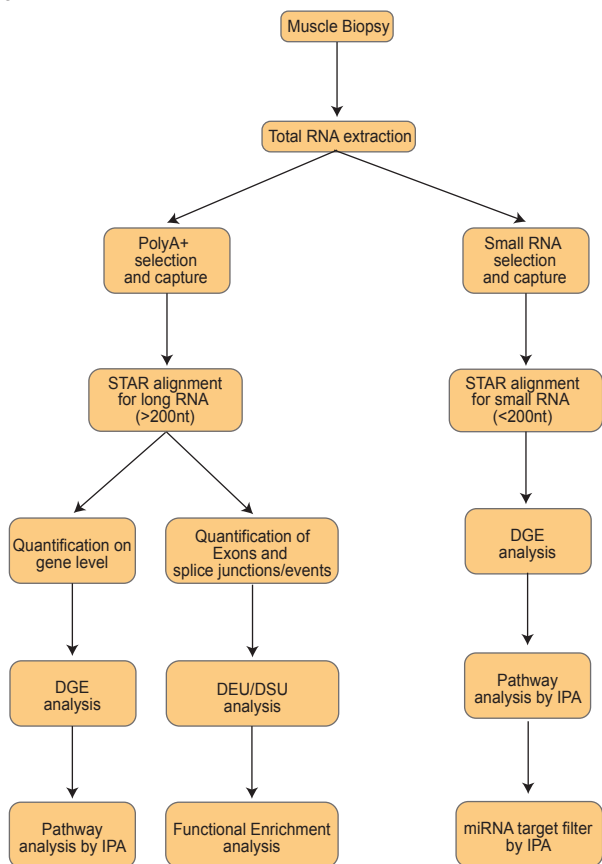

b

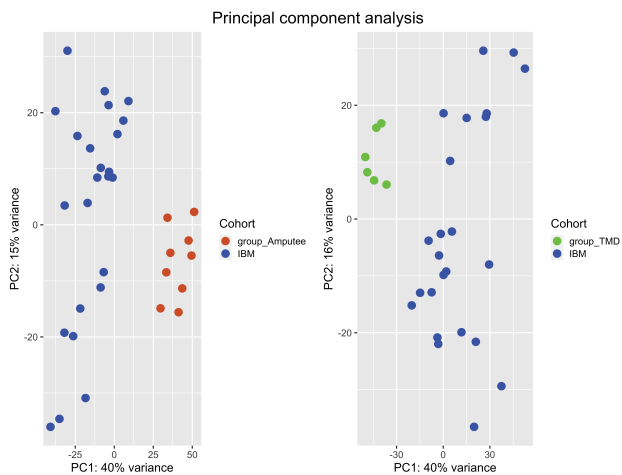

c

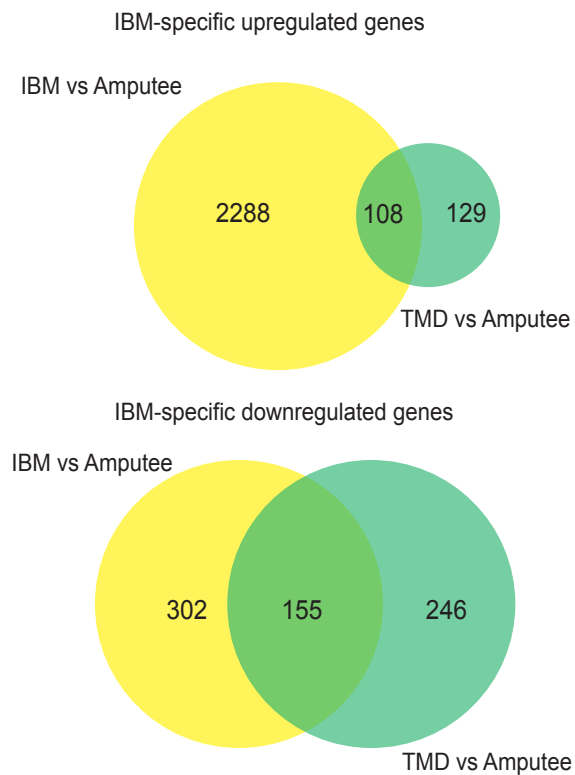

d

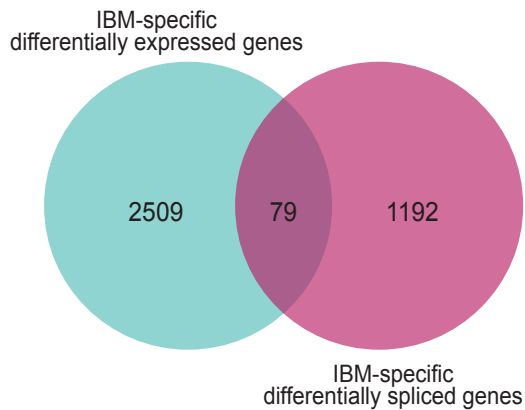

a

| Symbol           | Mean count | log2FC | pvalue   | padj     | GO terms                                                                                                    |
|------------------|------------|--------|----------|----------|-------------------------------------------------------------------------------------------------------------|
| <i>KDM7A</i>     | 1147.06    | -1.69  | 4.07E-32 | 2.39E-28 | Iron ion binding and oxidoreductase activity                                                                |
| <i>LGALS3BP*</i> | 2922.28    | 2.59   | 5.91E-31 | 2.89E-27 | Scavenger receptor activity                                                                                 |
| <i>TLR3</i>      | 128.42     | 2.29   | 3.98E-28 | 1.30E-24 | Regulation of dendritic cell cytokine production                                                            |
| <i>ATP6V0A1</i>  | 3393.79    | -1.76  | 3.01E-27 | 8.83E-24 | ATPase binding and proton-transporting ATPase activity                                                      |
| <i>IRF8*</i>     | 199.90     | 3.89   | 4.66E-27 | 1.24E-23 | DNA-binding transcription factor activity, RNA polymerase II-specific                                       |
| <i>SLC7A7</i>    | 216.91     | 3.16   | 2.08E-26 | 5.09E-23 | Amino acid transmembrane transporter activity                                                               |
| <i>FGL2</i>      | 1102.10    | 3.27   | 3.14E-26 | 6.58E-23 | T cell activation via T cell receptor contact with antigen bound to MHC molecule on antigen presenting cell |
| <i>B2M*</i>      | 46381.30   | 2.29   | 4.71E-26 | 9.22E-23 | Positive regulation of T cell mediated cytotoxicity                                                         |
| <i>MYL4*</i>     | 610.22     | 5.44   | 5.92E-26 | 1.09E-22 | Actin monomer binding, Calcium ion binding                                                                  |
| <i>UBE2L6*</i>   | 986.03     | 2.47   | 1.86E-25 | 3.04E-22 | Ubiquitin-protein transferase activity                                                                      |
| <i>SPPL2B</i>    | 1161.90    | -1.66  | 2.99E-25 | 4.39E-22 | Protein homodimerization activity                                                                           |
| <i>TUBA1A*</i>   | 2951.15    | 2.50   | 4.36E-25 | 5.81E-22 | GTPase activity, structural molecule activity                                                               |
| <i>TFAP4</i>     | 234.41     | -1.52  | 4.32E-25 | 5.81E-22 | Transcription regulatory region sequence-specific DNA binding                                               |
| <i>HLA-DRA</i>   | 8658.66    | 3.25   | 7.29E-25 | 9.00E-22 | Antigen processing and presentation of endogenous peptide antigen via MHC class II                          |
| <i>SOX11</i>     | 96.02      | 4.03   | 1.97E-24 | 2.23E-21 | DNA-binding transcription factor activity, RNA polymerase II-specific                                       |

b

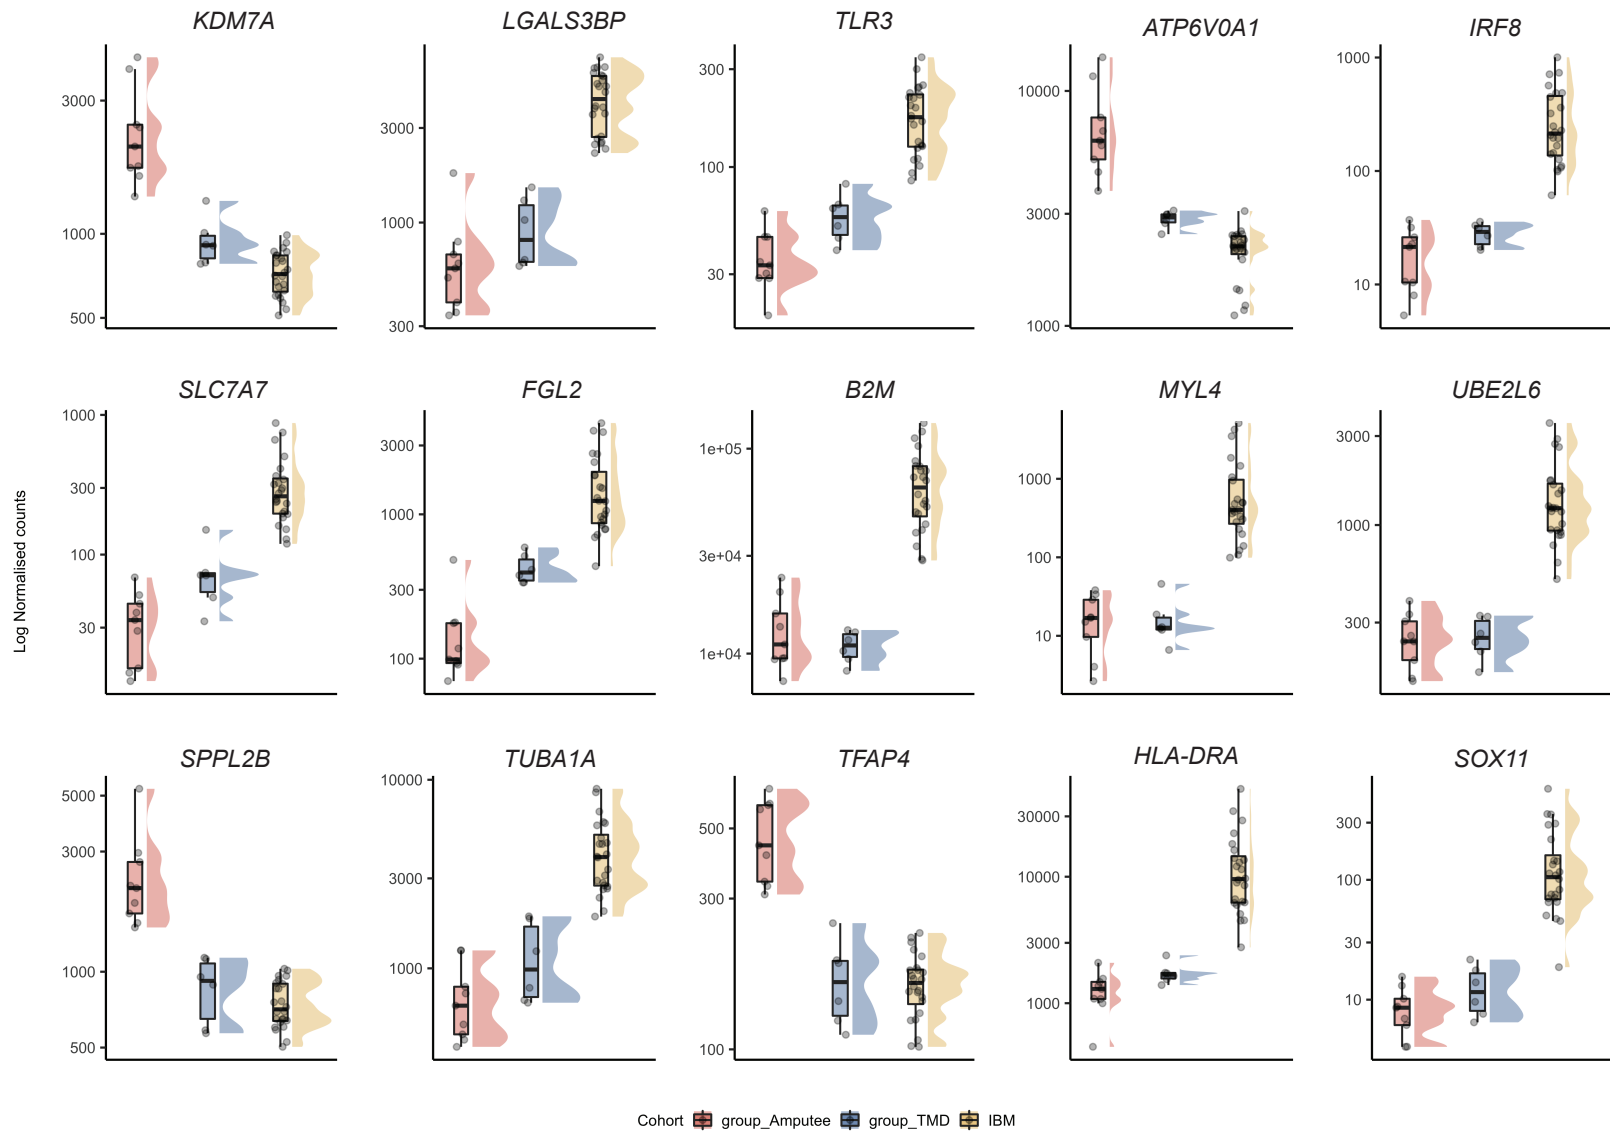

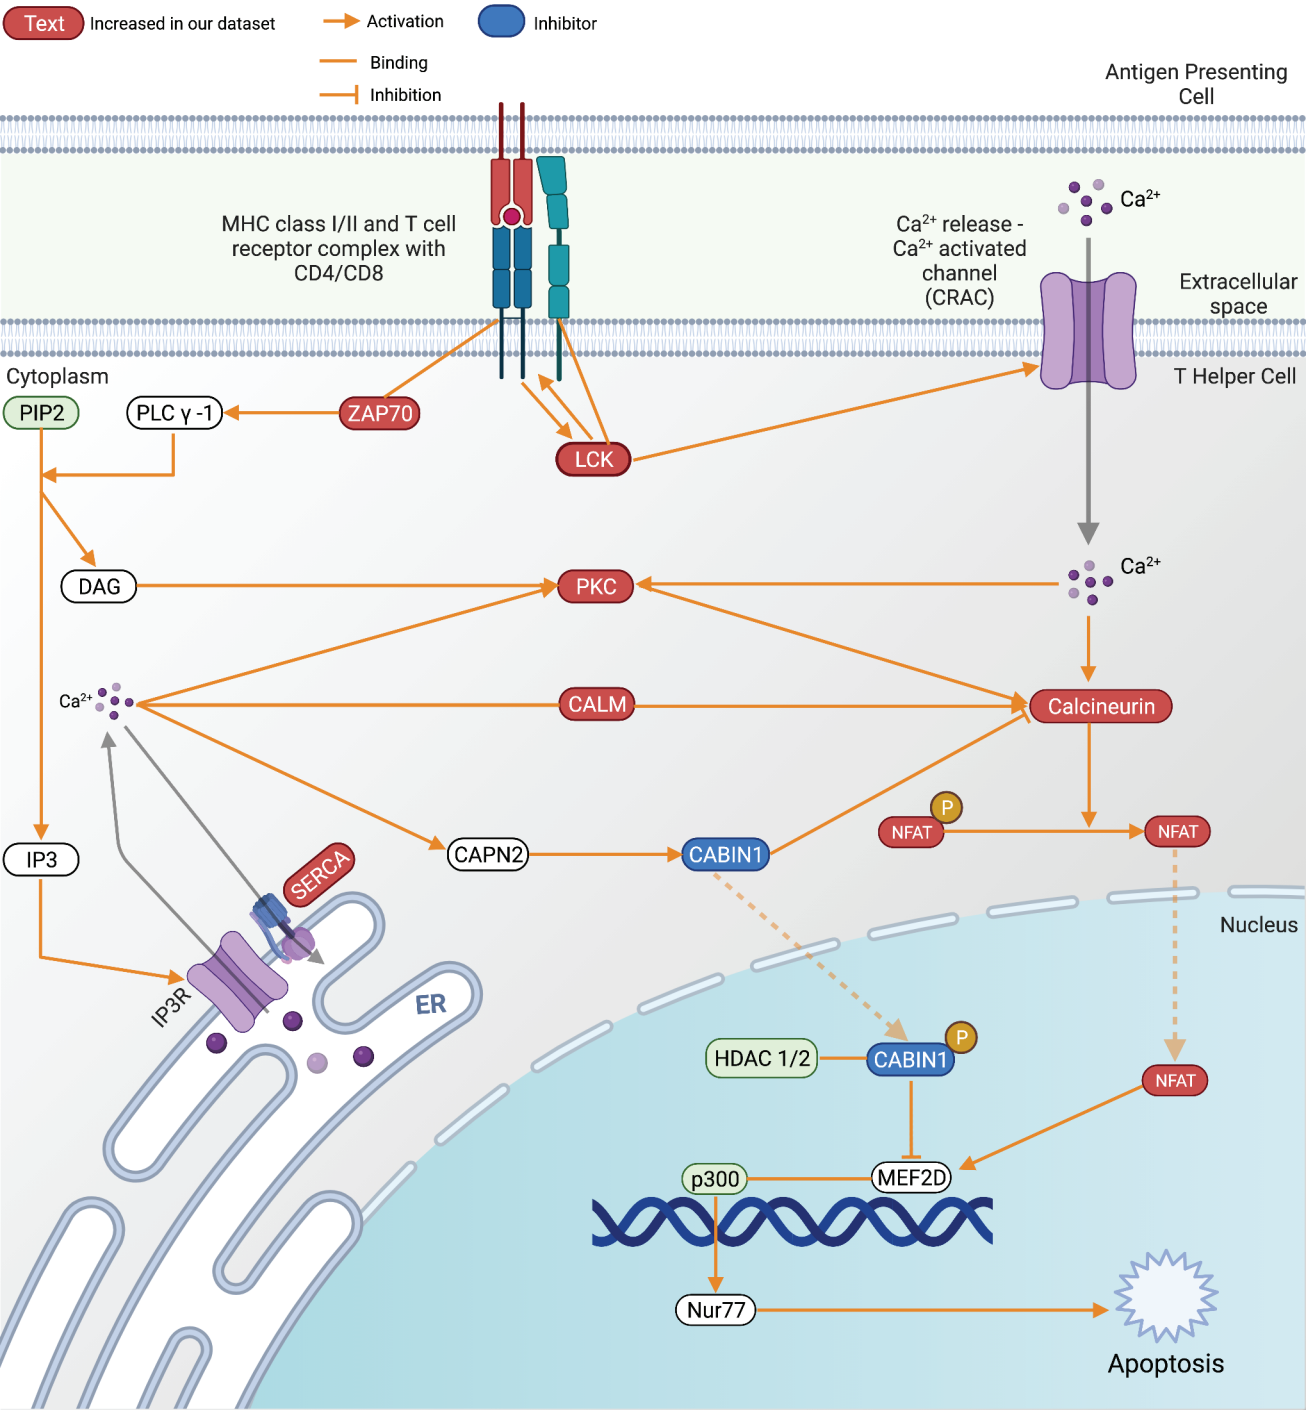



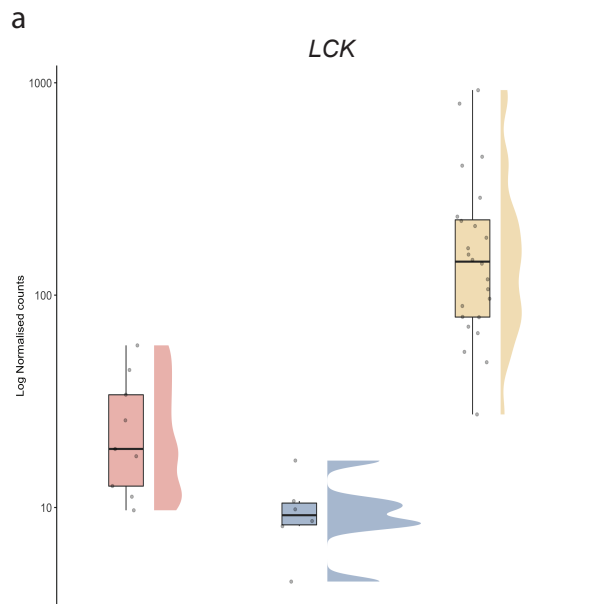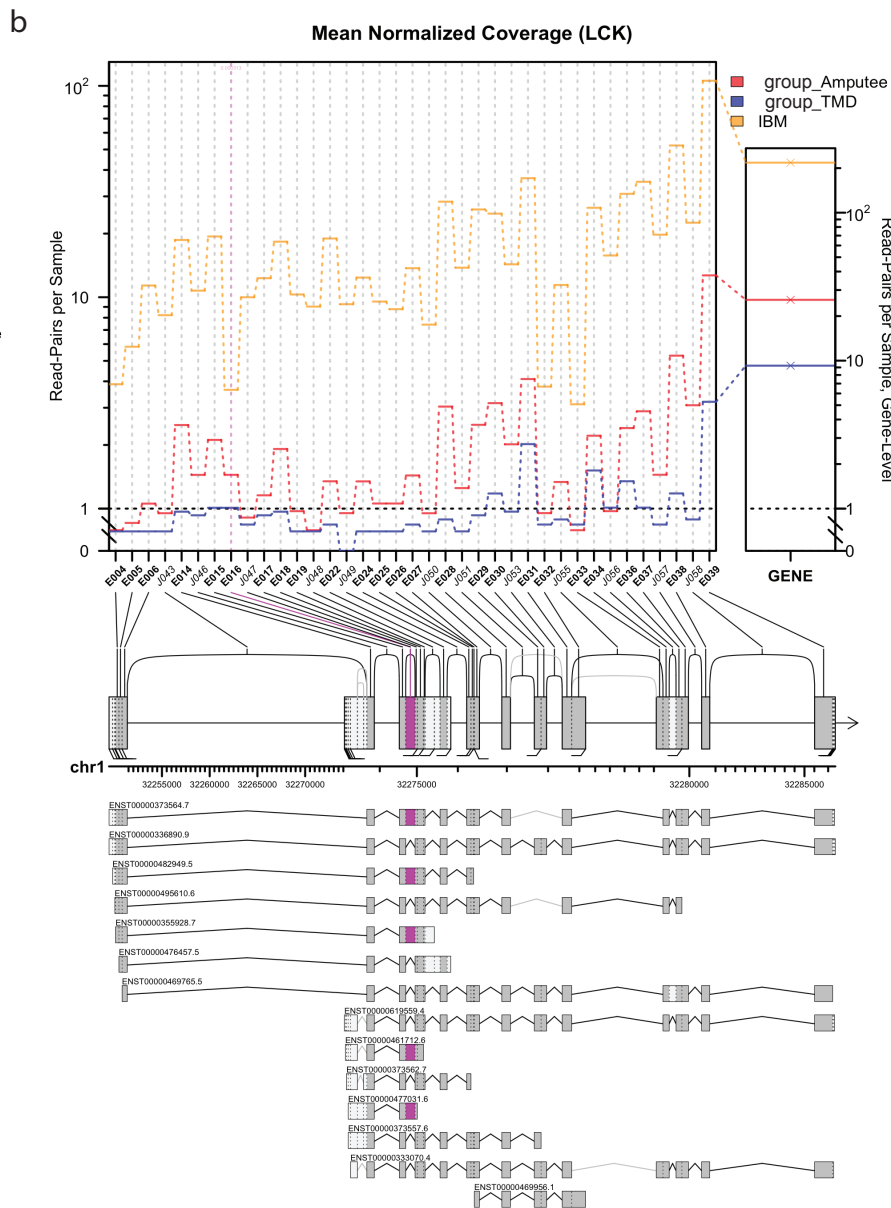

Source: https://www.biorxiv.org/content/10.1101/2021.06.30.450477v2.full.pdf
